# Supplementary material
Source: PubMed Central journal article supplement (PMC10548438)
Supplement: NIHMS1931381-supplement-1.pdf [file NIHMS1931381-supplement-1.pdf]

**Supplementary Table 1.** Features of Common Pancreatic Cysts

| PC                       | Pseudocyst         | SCA        | MCN              | IPMN                                    | Cancer   |
|--------------------------|--------------------|------------|------------------|-----------------------------------------|----------|
| Sex distribution         | Equal              | 75% female | > 90% female     | Equal                                   | Equal    |
| Mean age, y              | Not applicable     | 50s        | 50s              | 67                                      | 69       |
| Location in the pancreas | Anywhere           | Anywhere   | Body or tail     | Anywhere                                | Anywhere |
| Number                   | Single or multiple | Single     | Single           | 40% multiple                            | Single   |
| Dilated pancreatic duct  | No                 | No         | No               | In main or mixed-type IPMN              | Yes      |
| Cyst fluid               |                    |            |                  |                                         |          |
| CEA                      | <5 ng/mL           | <5 ng/mL   | >192 ng/mL       | >192 ng/mL <sup>a</sup>                 | <5 ng/mL |
| Glucose                  |                    | High       | Low <sup>b</sup> | Low <sup>b</sup>                        |          |
| Molecular markers        |                    | <i>VHL</i> | <i>KRAS</i>      | <i>KRAS</i> <sup>c</sup><br><i>GNAS</i> |          |

CEA; IPMN, intraductal papillary mucinous neoplasm; MCN, mucinous cystic neoplasms; PC, pancreatic cysts; SCA, serous cystadenomas.

<sup>a</sup>The CEA value has not been shown to be associated with high-grade dysplasia or cancer.

<sup>b</sup>≤ 50 mg/mL.

<sup>c</sup>*GNAS* and *KRAS* are used to identify mucin-producing cysts. They are not helpful in identifying high-grade dysplasia or cancer and are not used to guide surveillance intervals.
